# Supplementary material for: Evolution of a Cockroach Allergen into the Major Protein of Termite Royal Jelly
Source: MDPI journal article supplement (doi:10.3390/ijms241210311), 2023-06-18
Supplement: s1 [file s1]

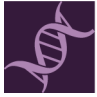

Supplementary Data.

## **Identification and origin of the major salivary protein in higher termites**

Jan A. Veenstra

Complete and partial deduced MA-1 and MA-2 transcripts from various termite species. When present signal peptides have been highlighted in yellow and the three amino acid residues methionine, cysteine and tryptophane in red.

## Archotermopsidae

*Zootermopsis nevadensis* from genome

MKLSIIFLAVVGLACGKSLPTRSLQDDLNDLFLALVPLDEVLGIALDYLAN  
DEQVQDFVYYLQSEEFHKIILTVEDVKELKDFLKFINDLGIDVYEILNQV  
HEILGLPPFKPDKHSRRGVGINGLINDVIAVLPTDKLKELFEEKKETSSED  
FKALIAAIQSPEFSNIVDALRAIKEYQDLLESLRNKGVDVDNIIFRAL  
FGLSRRGTRNLQDDLNDVLAHIPLDEVLAIGLDYLANDQEVQELVIYLS  
AEFHKIVLTVEAVPEFDEALQFVTERGIDAKAILDQIHEILGLPPRSSSK  
ITRRGSGIQGLIDDLVAVIHVDHLKELFEEKLQTSQDVKDLVDFIRSSKF  
EKILSTLRSIKEYQDLLQSLREKGVVDVGIIKFLKDLLGLARHY

*Porotermes quadricollis* worker GIAG01051081.1

FINDQGVDVYAFVNEIYEKLEKHPYQPTNTTHMVGIFYGLVNDVYSVLPL  
DDWAALLDEKMETGEFFKTIVTNIRSPVLVKMVEKLQAMPEYHELLEILR  
GKVYGERIVKLLWEVSRRGTHTLRDDLKEFMALFPTDDIIQITLDYLAN  
DPKLRIYASIPYEEFPKIHAIVEHFKEYAYCLKFINDQGVDVYAIISEV  
YNILDLPYQPTNTTHMVGIFYGLVNDVYSVLPLDDW

*Porotermes quadricollis* worker Trinity assembled from SRR9968577

NTRRGVGVSGLINDVIAVLPIEELRALFDKKLETSEDFKALVEAIQSPEF  
ATIIDSLHAIKEYQDLLEGLREKGVDELIIFRALFGLSRRGTRNLQD  
DLNDILAHVPLDAVLSIALDYLANDAEVQELVIYLSQSEEFHKIVLTVEAV  
PEFRETIKFISDRGVDAEAIQVHEILGLPPLSKSKNTRRGVGVSGLIN  
DVIAVLPIEELRALFDKKLETSEDFKALVEAIQSPEFATIIDSLHAIKEY  
QDLLEGLREKGVDELIIFRALFGLSRRGTRNLQDDLNDILAHVPLDA  
VLSIALDYLANDAEVQELVIYLSQSEEFHKIVLTVEAVPEFRETIKFISDR  
GVDAEAIQVHEILGLPPLSKSKNTRRGV

*Hodotermopsis sjostedti* (e.g. AB480784.1, DC235901.1, DC237539.1)

MKLPIVILAVLGLACGKSLPTRNLQDDLNDLFLALVPLDQVLAITLDYLAN  
DPEVQEFVYYLQSEEFHKIVLTVEDLQEFKDFVDFIEDRGIDVTGILNQI  
HEILGLPPLPASKNTRRGVGVSGLINDVIAVLPIEELRALFDKKLETSED  
FKALVEAIQSPEFATIIDSLHAIKEYQDLLEGLREKGVDELIIFRAL  
FGLSRRGTRNLQDDLNDILAHVPLDAVLSIALDYLANDAEVQELVIYLS  
EEFHKIVLTVEAVPEFRETIKFISDRGVDAEAIQVHEILGLPPLSKSK  
NTRRGVGINGLIEDLVAVIDVDLILAIKDKQETSEDLKELLDFIRSPKF  
EKILTTLRSIKEYQDLLQRLRDQGVVDVGIIKFLKDLELNRH-

## Kalotermitidae

*Kalotermes flavicollis* worker GHWY01015225.1

KLINSPEFRNLVEVLVSPSELKELVRKLRETPESRELEEDLRDKGVDLERI  
VERVKEAFRRSQRGTRSLHDDIKDILEVIPLEKIAAIAWDYVQHDEQVRE  
LARHIKTPEFQERVVRKVVESSEAKAIVEHLRDRGVPVDSVVSLLGLPTS  
SIRGKSTRRREGVNGLVDDVIDALPVEELKRVVKEKLINSPEFRNLVEVL

VSPELKELVRKLRETKEARELEEDLRDKGVDLERIVERVKEAFSRSQRGT  
RDLNDDLNDLFLALVPLDRILTILLDYLANDEEVQELILYIQSEKFHTIVL  
QVEALKETKDLLQFIRERGVDVDAIANLLHEILGLPPYAVRKNTRRGVGI  
NGLIDDLVAVLPIDELRALFEEKQHTSPDFKALIEAIRSPEFANILETLR  
KIPEYQELLQELRDKGVEVDRIIELLKALFGLSRRGTRSLRDDIKDILEV  
IPLEKIAAIAWDYVQHDEQVRELARHIKTPEFQERVVRKVVESEEAKAIVE  
HLDRGVVPVDSVVSLLLGLPTSSIRGKSTRRREGVNGLVDDVIDALPVEE  
LKRUVK

***Kalotermes flavicollis*** worker GHWY01103810.1

AALLDNILETKESFTTLVTVINPTVLMNMVDTVRSWPEYPEMHQIVREMV  
VHVKRVSCLVWEISLREHTIQNDVKEFMALLPTDKVLSITLDYIAKDPE  
FLEAVAYIQSEEFPNIHKVVEHLKEYKECLKFINDEGVDVYAFIYEVNYI  
LGLPPFPTTTTTTRNGVG VYGLMKDVI AVLPLEDLKAYVDKMMENREYLKT  
LVTPLKSLVLKMKVKT VNTVRSWPEYKKVLEIVREKGVNEKSITEILRTFY  
GPSLRGIHRLHEELKKYMALVPTDKVLEITLDYLANDQEVREFLVYIQSE  
EFPPIHTIVERLKEYKDCYKFINEQGVDVYAI VNEIHDILGLPPFEPTNT  
TRKGVGIIGLIDDVIAVLPLEDLAALLDKKLQTGEFFKTLVTAIHPPVFR  
KMVDTVQAWPEYPEMHEILREMAVYVERMSKLLWEIYLRENHIIKNYVKE  
FMTLLPTDEVLSITLDYIAKDPEFLEAVAYIQSEEF

***Bifiditermes mutubae*** worker GHZC01020198.1

LGIDVNSIINLIHEVIGLPPYAGRKNTRRGVINGLIDDLIHVLPIDELK  
ALFEEKLKTSPDFKALIEAIQSPEFKRILDKLESLEPFQKLLQNLRDKG  
VDVRIIELLKALFGLSRRGTRNLNDDLNDLFLALVPLDKVLGIVLDYLAND  
AEVQELILYLQSEDFHKIVITVEELEEFKLLIKIPENLGIDVNSIINLIH  
EVIGLPPYAGRKNTRRGVINGLIDDLIHVLPIDELKALFEEKLKTSPDF  
KALIEAIQSPEFKRILDKLESLEPFQKLLQNLRDKGVDVRIIELLKALF  
GLSRRGTRNLNDDLNDLFLALVPLDKVLGIVLDYLANDAEVQELILYLQSE  
DFHKIVITVEELE

***Cryptotermes secundus*** from genome

MKLPIVFLAVLGLACGKSLPTRNLNDDLNDLFLALVPLDEVLGIVLDYLAN  
DQEVQELILYLQSEEFHKIVITVEELDEFKLLIKIPEELGIDVNSIINLI  
HEIIGLPPYAARKNTRRGVGLNGLIDDLIAILPIDDLKALFEKKQQTSPD  
FKALIDAIQSPEFKSILDKLESLEPFQKLLQNLRDKGVDVDHIIIEFLKAL  
FGLSRRGTRSLKDDLKDLDVIPHKEIGVIVLDYVLHDREVSDLAIHVQS  
PEFRQLVEAVVNSDELKDIIAHLRDQGVVISQVNELLGFPALSLGDKAT  
RRGEGVKGLVDDVIKVL PVERLKEIFRDKLLNSADFRRLIDVILSPDFKE  
LVRRLKATSEFKELEDDLNRNGVDRDYIIQRLKEAFGLSQRGTRNLNDDL  
NDFLALVPLDEVIAIVLDYLANDQEVQELILYLQSEEFHKILIKIPEELG  
IDVNSIINLIHEIIGLPPYAARKNTRRGVGLNGLIDDLIAILPIDDLKAL  
FEKKQQTSPDFKALIDAIQSPEFKSILDKLESLEPFQKLLQNLRDKGVDV  
DHIEILLKALFGLSRRGTRSLKDDLKDLDVIPHKEIGVIVLDYVLHDRE  
VSDLAIHVQSPEFRQLVEAVVNSDELKDIIAHLRDQGVVISQVNELLGF  
PALSLGDKATRRGEGVKGLVDDVIKVL PVERLKEIFRDKLLNSADFRRLI  
DVILSPDFKELVRRLKATSEFKELEDDLNRNGVDRDYIIQRLKEAFGLSQ  
RGTRNLNDDLNDLFLALVPLDEVIAIVLDYLANDQEVQELILYLQSEEFHK  
IVITVEELDEFKLLIKIPEELGIDVNSIINLIHEIIGLPPYAARKNTRRG  
VGLNGLIDDLIAILPIDDLKALFEKKQQTSPDFKALIDAIQSPEFKSIL  
KLESLEPFQKLLQNLRDKGVDVDHIEILLKALFGLSRH

## Stylotermitidae

*Stylotermes halumicus* worker GIAK01115845.1

PEFKNFVKFINDLGVDVYTIINTIHDVLGLPPFQPKHTTRRGVINGLID  
DVIAVLPVDDLKALFAKKLETSEDFKALVQAIQSPEFANIVETLRALPEY  
QKLLQSLRDKGVE

*Stylotermes halumicus* worker GIAK01019216.1

QGVDVYAFISEIYYTLERHPFQPTNATRTGVGIYGLIDDVIAVLPLSDLK  
ALLDKKMEPSPLDLKTLVKLIDLPAFMSFVNKVRTWPEYYEMLEIIREKD  
VDVDRIIELFKELYRRGSPWLQDSLKEFMALIPTDKVLEITLDYLAYDQE  
LREFIVRIQSEEFPRIHTIVEYLLKKYKDCSPFISDQGVVYEIISEIHYI  
LEKHTFQPTNTTHMGVGIYGLIDDVISVLPLDDLAFLDKKMETGEFFKN  
LLTAIRSLDIMKMDVTQKMDVTVRAWPEYQEMLEILREMPYVEHIYKI  
LRELSLRGIHRLQDDLKDFMALVQTDKVLKITLDYLHEALVYIQSEEFK  
IHKIVEYLLKKYKDCSPFISDQGVYIYAIVDEVDRDILGLPPVPTNITRMGV  
GIYGLIDDVFAALPVEDLKTFFYMKMETREYFKVVVTAIRKTVITTIRSP  
LFLKMEIVKALPEYKKLLETLLKAGVDVVGIIKHVRVLLGLPPV

## Serritermitidae

*Serritermes serrifer* worker GIAH01045846.1

EIALNYLSNDAEVQELVIYILSDEFLGILKTVEDLQEFKDFAKFINDLGV  
DVYSIINTIHDILGLPPFQPKHIGLRGTGINGFIDDVINALPLEELKELF  
ENKLVTSSEDFKALVEAIQSPEFGKIVETLRSLPDYQKLLQSLRDKGVDVD  
RLIELLRALFGLPNRRGTRNLQDDLNEFLALVPTDKLIEIALNYLSNDAE  
VQELVIYILSDEFLGILKTVEDLQEFKDFAKFINDLGVDVYSIINTIHDIL  
GLPPFQPKHIGLRGTGINGFIDDVINALPLEELKELFENKLVTSSEDFKA  
LVEAIQSPEFGKIVETLRSLPDYQKLLQSLRDKGVDVDRLIELLRALFGL  
PPH

## Rhinotermitidae

*Coptotermes formosanus* from genome

MKVPPVILAVLGVAFGNPLPTRSLQDDLNDLFLALVPTDKVLEIALDYLSN  
DKEVQEFVIYIQSEEFLLKIHRRTVEDLKEYKDFVRFINDLGVDVYAIINKI  
HEILGLPPFEPKKDIRRGVINGLIDDVIAVLPLEDLRALFDRKLETSED  
FRALVKAIQSPEFANIVETLRALPEYQRLQSLRDKGVDVDRIELLRAL  
FGLPPH

*Coptotermes acinaciformis* GHZJ01147378.1

SHLPALTSISSLKMKLPVVILAVLGVAFGNPLLTRSLQDDLNDLFLALVPT  
DKVLEIALDYLSNDKEVQEFVIYIQSEEFLLKILRTVEDLKEFKDFVRFIN  
DLGVDVYAIIDKIHILGLPPFEPKKDTRRGVINGLIDDVIDVLPLEDL  
RALFDRKLETSEDFQALVRAIQSPEFANIVETLRALPEYQRLQSLRDKG  
VDVDRIELLRALFGLSGRGTRSLQDDLNDLFLALVPTDRVLEIALDYLSN  
DKEVQEFVIYIQSEEFLLKILRTVEDLKEFKDFVRFIN

*Coptotermes sp.* GDUG01028584.1

SEEFHKILLTVEDLQEFKDFLKFLNDLGVDVYAIINVIHDVIGLPPFQPR

HSTRRGVINGLIEDLLAVLPLEELKALFDLKLETSEYFQALVKGIQSEE  
FAKIVETLRAIPEYQDLLQKLREKGVVDVDQIIALLRALFGLPREVIKAVP  
F

***Coptotermes sp.*** GDUG01030152.1

QQLIDDLAVLPLDDL TALLDKKMETKDYFKTMTNLKSPVFMNMVNTVR  
SWPEYNEMVEILRVMVVDVEHMIQLLRELSMRETRSIQDDMKEFMALFPT  
DKFIQITMDYLANDPELHEFFAYIQSEQFPKIHRAVEYLQEYGNCFKFIN  
DQGVVDVYAFILEIRDTFGLPPFQPTNTTRMGVGIYGFIDDVYAVLPLHDL  
KAYFNMKMETRQYFKTIVTTIKTTFKIIRSPLFMNMANTVQSRPEYQKML  
ETLRQRGIDVE

***Schedorhinotermes intermedius*** worker+soldier GIAM01190288.1

FVRFISDLGVDVYAIINQIHDILGLPPFQPKHSTRRGVINGLIIDDVIAV  
LPLDDLKALFENKLETSEDFRALVKAIQSPEFQKIVDELRALPEYQELLQ  
GLRDKGVEVDRIIALLRALFGLSPRGTRNLQDDLNDFLALVPTDRVLEIA  
LDYLSNDREVQE FVYIQSEDFLKILRTVEGLREFKDFVRFISDLGVDVY  
AIINQIHDILGLPPFQPKHSTRRGVINGLIIDDVIAVLPLDDLKALFENK  
LETSEDFRALVKAIQSPEFQKIVDELRALPEYQELLQGLRDKGVEVDRII  
ELLRALFGLPPH

***Heterotermes malabaricus*** worker GHZS01013094.1

MKLPVVILAVLGLAFGSPLATRS LQDDLNDFLALVPTDRVLEIALDYLSN  
DKEVQDLVVYIQSEELRDSLKTVEDLQEFKDVVRVSEFGVDVPAIINKI  
NEILGLPPFEPKQNTRRGVINGLIIDDVIAVL PVEELRALLREKLETSED  
FRAFVTAIESPEFANLVNKLRESPEYQRLRESLREKGVDDRIIE LLRAL  
FGQSQRGTRSLQDDLNDFLALVPTDRVLEIALDYLSNDEEVKEFVVYIQS  
EEFLKILRTVEDLKEFKDFVRFISDLGVDVYAIINKIHDILGLPPFEPKQ  
NTRRGVGIKGLIDDVIAVLPLEELRALFEQKLQTS PDFQALVAGIQSPEF  
AKIVDTLRALPEYQDLLQKL RDKGVVDRIIE LLRALFGLPPQ

***Heterotermes tenuis*** worker GHZU01060508.1

NTRRGVGLNGLIDDVINVLPLDKLKALFEEKLQTSEEFQALVKAIQSPEF  
AKIVETLRDLPEYQNLLQSLRDKGVVDVHIIELLRALFGLSRRGTRSLQD  
DLNAFLALVPTDKVLEIALDYLSNDREVQE FVYIQSDEFLKVLATVEDL  
REFKDFVRFINDLGVDVYGIIDRIHEILGLPPFEPKKNTRRGVGLNGLID  
DVINVLPLDKLKALFEEKLQTSEEFQALVKAIQSPEFAKIVETLRDLPEY  
QNLLQSLRDKGVVDVHIIELFRALFGLPPH

***Heterotermes tenuis*** worker GHZU01060499.1

MKVPIIILAFLGLICGKPLPIGKLQDELNEFLVLVPTDKILEIALDYLAY  
DPEVKEFVVYIQSEEFPKIHRVVEYLKEYKDCFKFFNDQGVVDVYAIVNEI  
HDILEEHPFQPTNTTTRTG VGFYGLIKDVVAVLPLDDWTALLDKKLEAGDL  
FKTLVTATPVFMKMDNVRTWPEYHELLEILREMVVKVEPSIELLWEIFL  
RETRSLQEDLHDFMALIPSNKIFDIVLDYLLNYKELQE FVYIRSEEFPK  
IHKIVEYLNKENCKFKFYNDGVDVYIINEIRDILDLPFQPTNTTTRTG  
GIYGLVDDVIGVLPDDLKALFDKKTETREYFKTLVKVLKSPVLVKMVHT  
VRYSFLPKMVDTVRSLPEYHEVLEILREKVVDVDRIVELFRKLYWRGTHK  
LQYELKELMALFPTKKVLEIALDYLAYDEEVRQFLVYIQSEKFPKIHKIV  
EHLKEYKDC LKFINDEGVVYEIINEIYDNLGFPFPFPTNTTTRTG VGIYG  
LIDDVIAVLPLDLTALLGKKIETKEFVKALVSVIHSPVFNMVNTVRAWP  
EYNELNLILRVTVVDVKPIIKLLWELSLRGTHVIQDDLKEFMALVPTDKI

IQITLDYLANDPELHKMFVYLQSEEFPKIHKIVEYLKKYKCLTFIDEYGV  
VDVYAFVLEVRDILGLPPFEPTNTTHMGVGIYGLIDDVFAVLPVDDLKAL  
YHMKMKTREYFKVVTTIRSPLYVKMVETVKALPEYKKLVEILREMGVDV  
VGIIKHVRVLLGLPPI-

***Prorhinotermes inopinatus*** GHYS01118366.1

NIVDTLRALPEYQRLLEGLREKGVEVDRIIELFRALFGLSRRGTRSLQDD  
LNDFLALVPTDKVLEIALDYLSNDQEVQEFVVYIQSEEFKILKTVEDLK  
EFKDFVRFINDLGVDVYAIINQIHDILGLPPFQPKSTRRGVGLDGLIDD  
VIRVPLDDLALFDKKLETSEDFQALVKAIQSPEFANIVDTLRALPEYQ  
RLLEGLREKGVEVDRIIELFRALFGLPPH

***Reticulitermes speratus*** from genome

MKLPIVILAFLGLALGKSLPTRSLQDDLNDLFELVPTDKVLEIALDYLSN  
DSEVQEAVVYIQSEEFILTILRTVEELRNKTFVRFLSDHGIDVVAIINRI  
HDILGLPPFQPKQSTRRGVGLINGLIDDVIAVLPLDDLALFDEKLENSED  
FKALVEAIQSPEFANIVNTLRALPEYQRLLENLREKGVDDVDRIIELLRAL  
FGLPPRRGTRSLQDDLNDFLALVPTDKVLEIALDYLSNDSEVQAAVVYIQ  
SEEFILTILRTVEELQEFKDFVRFLSDHGIDAVAIINRINDILGLPPFQPK  
QSTRRGVGLINGLIDDVIAVLPLDDLKALFNEKLENSEDFRALVEAIQSPE  
FANIVNTLRALPEYQRLLENLREKGVDDVDRIIELLRALFGLPPRRGTRSL  
QDDLNDFLALVPTDKVLEIALDYLSNDSEVQAAVVYIQSEEFILTILRTVE  
ELREFKDFVRFLSDHGIDVVAIINRIHDILGLPPFQPKQSTRRGVGLINGL  
IDDVIAVLPLDDLALFDEKLKNSSEDFRALVEAIQSPEFANIVNTLRALP  
EYQRLLENLREKGVDDVDRIIELLRALFGLPPH

***Reticulitermes aculabialis*** GHMS01001114.1

FLALVPTDKVLEIALDYLSNDSEVQEAVVYIQSEEFILTILRTVEELREFK  
DFVRFLRDHGIDAVAIINTINDILGLPPFQPKHSTRRGVGISGLIDDVIA  
VLPLDDLKALFEKKLETSEDFRALVEAIQSPEFANIVDTLRALPEYQTL  
EKLREKGVDDVDRIIELLRALFGLPPRRGTRSLQDDLNDFLALVPTDKVLE  
IALDYLSNDSEVQEAVVYIQSEEFILTILRTVEELREFKDFVRFLRDHGID  
AVAIINTINDILGLPPFQPKHSTRRGVGISGLIDDVIAVLPLDDLKALFE  
KKLETSEDFRALVEAIQSPEFANIVDTLRALPEYQTLLEKLREKGVDDVD  
RIIELLRALF

***Termitogeton planus*** nymph GHXB01007738.1

YGLINSVNDILGLPPLKPMKSTRRGVGLDGLITDVIAILPVADLEELFAK  
KLATSPDFQALVEGIQSPEFARIVEVLRGLPEYQDLLNNLRAKGVDIDHF  
IELLRALFGLSRRGTRNLQDDLNDFLALVPVDRVLEIALDYLSNDKEVQE  
FVIYIQSEEFVKILRTLEDLQEFKDFIKFLSDLGVDAYG

***Termitogeton planus*** nymph GHXB01011760.1

MKIQIVIWAVLGLACGKYLPTVPLEDDLKEFMTLVPKDKLFEIALEYLYH  
DREVKEFVVYLQSEEFPKIHTFIEYLKEYKEVKVPCLKFFDEYGFVYEI  
VHHIHDVLHLPPEPTNRTYMGVGIHGLIEDVISVLPLKELKVLYEKKLE  
TREYFKTLVTTIKSPVFKSVLDKVRTWPEYYKLLLEILREKFVDLDHIHEL  
LYELYWRGIHILEHELKEFIPLDPTAKVLDILLDYLTYPDELKEFIVYIQ  
SEEFPKIHKIVEYLKKYKELYVPCLYIDEYGVVDVYAIIVHEIYDIISEIY  
IILGLPPLEPTYTTRMGVGIPGLIEDVITVLPLDELKVLIEKKVETKEYV  
KILYTVIHSPEFMEVYTLRVLPEYKELVEFLLKIGVDVGRIIELVRTLL  
SLPRL

## Termitidae

***Jugositermes tuberculatus*** worker GHZX01073273.1

MKLPIVILAVLGLAYGKSIPTRNLDLDDFLALIPLDKVLEITLDYLAN  
DPEVQEAVIYIQSEEFHTIVTTVEALPEFKTLVKFIGDLGIDIYTIINTI  
HDIIGLPPYQPKHSTRRGVINGLLDDLI AVL PVEELKALYEEKLKTSPD  
FQALIAAIQSAEFATILETLRALPEYQKLLDSLREKGVVDVRIEFLKAL  
FGLSRRGTRNLQDDLDLFLALVPLAQVLEVALDYLANDAEVQEFMVYLQS  
EEFYKIIDAVEKLRFRNFLELINGLGVDIYTIINTIHDILGLPPFVPKY  
NTRRGVGIKGLLDDLI AVI PLDDLKALFEQKKQTSPDFQVVIAAIQSPEF  
KVIVDTLHALPEYNALLDNLRAGVDVDHII AVL REL FGLPP

***Jugositermes tuberculatus*** worker GHZX01073285.1

MKLPIVILAVLGLACGKPLPTGKVQDDLKEFLELVPTDKVLEIALDYLYY  
DKEVKELVVYIQSEEFPIHKIVEYLM EYKD CLKFINEYGV DVYAVIKEI  
HDILESHPFEPNTIRMGVGIYGLIDDVIAVLPLDELKALFEKMETREY  
FRTLVT PFKSPVFMK MVDTVRSWPEYQELLEILRGKVVDVDR TIELLRVL  
YWRGTRKIQEDVKEFLKFVPQHKVFEIVLDYLSNDKEVKEFVVYIQSEEF  
PYIHKIVEYLKEHKA CFKFIDEYGV DVYAIKEIHDILRFPFPFEP MNTTR  
MGVGFQGLIDDVIAVL PPLDGLKALYEKEMEIRE CLKTLYTAIYSPVFRK  
MVDILRDWPEYQEILDYLGKEQEILDYLRGKGVDPYIELLRTLYSLS  
WRGIHILQEDMTEF MALVP THKFFEIALDYLAYDPEVQKFIVYIQSEEF  
MIHKMVEYLKEYKDLLKFIDEHRVDVYAIKKIHDTLGFPPFEPTNTTRM  
GVGIHGFIDDVIAVFP LDDLKTLVVKKMETREYLRPLVPVYKTVVKTVRS  
PEFKKMVDTLRAMVDTVQTWPEYQKL VQMLRDKVFEDEHIIELFTELREL  
FWRGTHILKDDLTEFMTLVPTDKVLDITLEYLAYDPKLKEFFVYIQSEEI  
PMIHTIVEYLKEYKDLLKFIDEHRVDVYAIKKIHDTLGFPPFEPTNTTR  
MGVG

***Leptomyxotermes doriae*** worker GHZY01097234.1

MKFPIVFLAVLGLVCGKSLPTRNLQDDLNDLFLALVPLDKVLEISLDYLAN  
DQEVQDAVIYLSPEFHKILTTVEDLKEFKDFLK FVNDLGVDVYSIINTI  
HDVLGLPPFQPKHSVRKGVGLNGLIDDVIDILPVDELKALFDKKLQTSPE  
FQALVAGIQSPEFKNILDNLRAVPEYQDLGQSLQEKGVVDVDHIEELLKAL  
FGLSRKGTRTLQDDLNDLFLALVPLDKVIEIALDYLANDQEVQEAVIYLS  
PEFHKILTTVEDLKEFKDLVKFINDLGVDIYSIINTIHDVLGLPPFQPKH  
SVRKGVLNGLIDDVIDVLPVDELKALFDKKLQTSPEFQALVAAIQSPEF  
KNIVDTLRAIPEYQDLLQSLRDKGVVDVDHIEELLKALFGLSRKGKSLPTG  
TLQDDLNDLFLALVPIDKVLEISLDYLANDQEVQEAVAYLQSEEFYMILTT  
VEDLKEFKDFVEFMNDLGVDVYALDN

***Cavitermes tuberosus*** worker GHZE01030677.1

MRELFHLLALMKLPIVFLAVLGLVWGKSLPTRTLQDDLDDFLALIPLDKV  
LEIALDYLANDPEVQDAVIYLSPEFHKILTTVEALQEFKNFVKFINDLG  
VDVYTIINTIHDILGLPPFQPKHSTRRG TGLSGLINDILDILPLDDLKDL  
FNKKLETSPDFKALVAGIQSEEF AKIVDTLRALPEYQVLLQNL RDKGIDV  
DQIIQLLRSLFGLPQKGSRTLQDDLDDFLALIPLDKVLEIALDYLANDPE  
VQEAVIYLSPEFHKILTTVEALQEFKNFVKFINDLGVDVYTIINTIHDIL  
GLPPFQPKHSTRRG TGLSGLINDILDILPLDDLKDLFNKKLETSPDFKA  
LVAGIQSEEF AKIVDTLRALPEYQVLLQNL RDKGIDVDQIIQLLRSLFGL  
P



***Cavitermes tuberosus*** GJZF01090478.1

VDVYAFILEIHDFLHLPPEPTNTPPMVGFLGLVRDVIAVFPLDDLKVV  
FDKTEIRKYFKTLVTAVHSLFVNVVDTVKTWPEYEKLLLEIIREKVFVDVR  
IIELFRELYLRGNHKLQEDLKEFMALLPSNKVFEIVLDYVSYDEKLREFI  
VYIQSEKFPPHKKIVEHLTEYKDCCLKFINDEGVDVYAIILEIHDILGLPP  
IEPTNTIPMGVGIYGLIRDVVAVLPLDDLTVFLDKKLGTKDFFMTLITAI  
RSPVLMVMVNIVRSWPEYHELLKILRGMVVDVEPIIKLLKETLLRETHSI  
RDDVKEFMILFPTDKVIHITLDYLANDTRLHEIFAYIQSEEYPIIPKIVE  
YLKEYKYCLKFITDEGVDVYAIILEIHDILGLPPIEPTNTIPMGVGIYGL  
IRDVVAVLPLDDLTVFLDKKLGTKDFFMTLITAIRSPVLMVMVNIVRSWP  
EYHELLKILRVMVVDVKPIINLLKETLLRETHSIRDDVKEFMILFPTDKV  
IHITLDYLANDTRLHEIFAYIQSEEYPIIHKIVEYLKEYKHCLKFIDDQG  
VDVYAFILEIHHILGLPPLEPVDTRTGVGIFGLIDDVYAVLPLEDLKEF  
FHLKMTREYFKILVTSLKTTVTTRISPVIVNVDTVRALPEYQKLEIL  
LEMGVDDVLIIERLKVLYALLPF

***Inquilinitermes inquilineus*** GKIC01204865.1

MKLPIVFLAVLGLVCGKSLPTRNLQDDLNDFLALVPLDKVLEIALDYLAN  
DPEVQEAVIYQLQSEEFHKILTTVEALPEFKNFVKFISDLGVDVYTIINTI  
HDILGLPPFQPRHSTRRGVGLSGLIQDITAVLPLDDLKALFENKLQTSPD  
FQALVAGIQSEEFKIVNTLRALPEYQELLQTLRDKGVDVDQIIALLRAL  
FGLPQKGTRSLQDDLDDFLALIPLDKVLEIALDYLANDPEVQEAVIYQLS  
EEFHKILTTVEALPEFKNFVKFISDLGVDVYTIINTIHDILGLPPFQPRH  
STRRGVGLSGLIQDITAVLPLDDLKALFENKLQTSPDFQALVAGIQSEEF  
KIVNTLRALPEYQELLQ

***Inquilinitermes inquilineus*** GKIC01076654.1

NMVDTVRAWPEYKKLFDSLRRRGVDVERIIEHLRALFGLSWRGNNWLQDD  
LKEFLALVPTDKVLEIALDYLANDQEVREFVEYIQSEEFPKIHTIVEHLK  
QYKDCCLKFINDQGVYAIINEIYNFLDLPPFQQTNTTTRTGVGMQGLVDD  
VIAVLPLDDLKALFGKTETRKYFKAMFTAIHSPAFMMVDTVRTWPEYNK  
LQQLREKVFVDVRIWELFRELYWRGTHRLQDELNEFMEHLPTDKFLEIL  
LDYLANDEEVREFAVYIQSEEFPKIHKVVEYLKEYKYCLRFINDEGVDVY  
ELILEIHDFLNLPPLEPTTTTTRMGVGFLGLVHDVIAVLPFDDLKAFFDKT  
EITKYFKTLVTAIQPHYVNVVDTVRTWPEYKKLLEIREKVVDVDRYIEI  
FRELYWRGINKIQDQYLYQYVQYIQDYLKEFMAIFPTNKVFEIVLDYLAY  
DKQVREFLVYIQSEEFPLIHKIVEYLKEYKYCLKFITDNGVDVYTFIL

***Embriatermes neotenicus*** worker GHZN01085478.1

IALDYLANDPEVQEAVIYQLQSEEFHKILTTVEALQEFKNFVKFINDLGVD  
VYTIINTIHDIIIGLPPFQPRHSTRRGVGLNGLFDDLTAVLPLDELKALFE  
EKLQTSPDFQALVAGIQSPEFAKIVETLRALPEYQNLLQSLRDKGLDVDR  
LIELLRALFGLSRRGTRTLQDDLNDFFVALIPVDKVLEIALDYLANDQEVQ  
EFVTYLQSDEFHVIINTIEGLQEFRDFLKFNLGLGVDVYAIINTIHDIIIG  
LPPFQPRHSTRRGVGLNGLFDDLTAVLPLDELKALFEELQTSPDFQALV  
AGIQSPEFAKIVETLRALPEYQNLLQSLRDKGLDVDRLELLRALFGLPT  
F

***Euhamitermes* sp.** worker GHZ001132964.1

MKIPIVILAVLGLACGKSIPETRRLQDDLNDFFALVPTDEVLAIALDYLA  
NDVEVQEAMIYQLQSEKFHTIVLTIEGLQETKNFLEFIDNTGLDIYLYLNT



LHDFIGLPPYVPKHSIRRGVINGLLQDIIAILPVEDLKALFDEKLQTSP  
DFQAFIASIQSEEFVILDTLRALPQYQELLNSLSEKGVDAAIIEFLKT  
LFGLSRQGTRTLQDDLDDFVALLPVDVLLGIALDYLANDAEVQEFMVYLQ  
SPPFHLIITTEEALPEFKNFVDFIVVHGVDAYGIINTVHDILGLPPYGSK  
YHTRRGVINGLLQDVIANPLDELKALFDDKKGTSPDFQDLLAAIQGPE  
FTVIVNTLHALPEYNSLLDDLRAKGVVDVGGIIAALRELFGLPPL

***Euhamitermes* sp.** worker GHZ001109466.1

VKEFVAYM HSEKFPYIHKPVEYLKQYKL CLKHIDVYAIINKVYDTLGLPP  
FEPTNNARTGVGFLGLKDDM IAVFPLDGLKALVEKKM ETREYYKPLLPA  
KTLVKIISHEFKKIVDTRARM VDTVVRPMM VDLVRNWPKYW PEYQKQFE  
MLREKYFNKDHIIEKLGKFRELFLKGIHYLKEDITEFM ELVPPHKFFEIS  
KEYLTYDPEVQEFVAYIQSEKFPFIHKPVEYLKQYKPC LKIDVYAIINK  
IYDTLGLPPFVPTNTTTRTGVGFGHLKDDM IAVFPLEDLNAFFEKKM ETRE  
YYKPLLPAKYTLVKTIQPHVLKKIVNTVRLIM VDLVQPM VDLVQPM VDLV  
LVQNWP KYLSEYQKQFVM LREKYFNKDRIVHKLGEIRDRLFQGYILKED  
LQELNSLVPTKKVLIITLDYVAYDPELQELLDYIQSEKFPPIHNFVGYLK  
GYKDRQLQFIDDRGVNIYAIIVKIYDTLGYPLPEPTNTTHSGIQGLM PKVI  
ASFPLEDLNAFIEKKM EAREYYKPLLVPYKTLVKTIESPVLKKVVVTVRA  
RM VDTVVRPMM VDLVRNWPQYW WPEFQKQFEM LRENVFDKDRVIELLRELRE  
LFLQGAYILKDDLQEFM PLVPAGKVCDIILVYLAYDPEVQEFLDYIQSEE  
FPVIHNIVEYLKGYKDHLQFIDDHGVNIHAIKIFYDTLGYPPLEPTNTT  
PNGIQGLKQNVIAAFPLEELKAFVAKKIETRPYFRTM VSTYNTLVTTIQS  
PEFRM M VYAVRSFM VDTVGSW PEYQEVVEM LREKAFDVNRTIELLRDLSK  
LFWRGAYILIDDLQEFM SLVPTDKVLDITMDYLTYPPEVQEFLDYIQSEE  
FPMIHNIVEYLKEYKDRLPFINDHGVDFYAIKQVHDTLGYPLFEPTNTT  
RTGVGFHGLIHDVIAAFPLDELKAFVENKLETRNYFKILVTVYKTLVATL  
QSPEFREMV DTVRAFMD LTLQAFTEHQRLLEILHEM GVDVDRIEELLRKL  
FNW TPF

***Anoplotermes banksi*** worker GHYX01127898.1

MKIQIVILAVLGLACGKSIPTRTLQDDLNDLLALIPLDELLGIALDYLAN  
DEQVQETVIYLQADEFHKIVLTIEGLQETKNLLQFVNDLGVDVYSILNTL  
HDIIDLPPYQPSRSTRKGVGLNGLIDDIFAILPTDALQALYNDKLQNSPD  
FQALVAALQGPEFATILETLRALPEYQGFLQFLSDKDQVDVDRIIALFKAL  
LGISRQGTGRTLQEDM DDFVALVPLDAVLTVALDYLANDQEVQDFMVYL  
QSDPFYKIIGTVEALQQFKDFLVIINDLGIDVYSIINTIHDILGLPPYVP  
KHNTRLGVGISGLLNDELALLPLDDLKALFEQKKQTSADFQAVVSAIQSP  
NFAVIVDTLHGVPEYNALLNSLRDKGVVDVDSIIAALRHLFDLPTF

***Microcerotermes* sp.** worker GHYV01038129.1

MKFPIVFLAVLGLVCGKSLPTRSLQDDLNDFLALVPLDKVLEIALDYLAN  
DPEVQEAIYILQSDEFHKIITTVEALPEFRDFLEFLNGLGIDVYAIINTI  
HDVLGLPPFQSRHSTRRGTVGNGLLEAVIDVLPDELKALFDKKLETSED  
FKALVKGIQSPFEAKIVDTLRGIPEYQDLLKSLKEKGVVDVDRIEELLRAL  
FGLSRRGKSLPTRSLQDDLNDFLALVPLDKVLEIALDYLANDPEVQEAI  
YILQSDEFHKIITTVEALPEFRDFLEFLNGLGIDVYAIINTIHDVLGLPPF  
QSRHSTRRGTVGNGLLEAVIDVLPDELKALFDKKLETSEDFKALVKGIQ  
SPEFAKIVDTLR

***Pseudacanthotermes militaris*** worker GHYT01045980.1  
EYQNLLDSLRAKGVVDRIIEFVRTLFGVSRRGTRSLQDDLDDFLALLPR

DQIVSIALDYLANDQEVQDLVVYAQSEEFHNIIVTTVEALPEYKNFVKFLS  
DHGLDVTSFIDTIHDAIGLPPYQPRHSTRRGVGLISGLINDLIALIPVDKV  
KALFEEKLETSPDFKAFVEAIQSPEFQSIVETLRALPEYQNLLDSLRAKG  
VDVDRIIEFVRTLFGVSRRGTRSLQDDLDDFVALLPLDQVIDIVLDYLAN  
DQEVQEFVVYIQSDEFHKIVTTVEALAEFKNFVKFLSDHGLDVTSAINTI  
HDAIGLPPYQPRHSTRRGVGLISGL

***Occasitermes sp.*** worker+soldier GIAP01117651.1  
FVKFISDLGIDVYTIINTIHDILGLPPFQPKHSVRRGVGLNGLIDDVINV  
LPLDDLKALFEQKLQTSDFKALVAGIQSPEFANILNTRLRAIPEYQDLLQ  
TLRDKGVDVDHIIELLKALFGLSRKGTRTLQDDLNDFLALVPLDKVLEIA  
LDYLANDPQVQDAVIYLSQSEFHKILTIVENLKEFKDFVKFISDLGIDVY  
TIINTIHDILGLPPFQPKHSVRRGVGLNGLIDDVINVLPDELKALFEQK  
LQTSDFQALVAIQSPEFANIVATLRALPEYQDLLQTLRDKGVDVDRII  
ELLRALFGLSQ

***Occasitermes sp.*** worker+soldier GIAP01117649.1  
FITDQGVVDVYEIIESEIHYILEKHPFQPTNTTRMGVGFYGLIDDVIAVLPL  
DELAFLDKKLITGEFFKNLLTAIRSLDVMMKMDTVRAWPEYREMLEILR  
EMVPYVERIYKLLWEPSSLREIHLRLQDDLKKFTALFPTDKVLEIIRDYLES  
DPELHKVLVYIQSEEFPKIHTIVEDLKEYKDCFKFITDQGVVDVYEIIESEI  
YYILEKQPFQPTNTTRMGVGIYGLIDDVMAVLPLDDLTALLDKKLETREL  
FRSLLTAIRSLDVMMKMDTVRAWPEYHEMLEILQEMVPYVERIYKLLWEP  
SLREIHLRLQDDLKKFTALFPTDKVLEIIRDYLASDPELHEVLVYIQSQEF  
PRIHKIVEYLKEHKDCFKFISDQGVVDVYAIIESEIHYILERHPYQPTNTTR  
TGVGIYGLIDDVIAVLPLSEWKALLDKKMEASQYLKTLVKLIDIPAFMSI  
VDTVRSWPEYYELLEIVREKDVVDHRIIGLKFELYKRGTPWLKDSLKELM  
AIIPDMMVLEIALDYLA

***Sphaerotermes sphaerotherax*** worker GIAI01046998.1  
IHDILGLPPFQPKHSTRRGVGLNGLIDDVLA VLPLDELKALFDQKLQTS  
DFQALVKAIQSPEFAKIVDTLRAWPEYQDLLQKL RDKGVDVDRIIE LLRA  
LFGLSRRGTRTLQDDLNDFLALVPTDKILEIALDYLANDPEVQEAIYIQ  
SEEFKILTVEALQEFKDFVKFINDLGVDVYAIINAIHDILGLPPFQPK  
HSTRRGVGLNGLIDDLIAVLPIDELKALFDQKLQTSDFQALVKAIQSPE  
FAKIVDTLRAWPEYQDLLQKL RDKGVDVDRIIE LLRALFGLSRRGTRTLQ  
DDLNDFLALVPTDKILEIALDYLANDPEVQEAIYIQSEEFKILTVEA

***Astratotermes sp.*** worker GHYY01048487.1  
MKIPIVILAVLGLVCGKSIPTRTLQDDLDDFLALIPVDKILEIALDYLAN  
DPEVQDAVIYLSQSEFHKIVLTVEGLQETKDLLKFVYDLGLDVYAILNTI  
HDIILLPPFVPHSTHRGVGLNGLDDILAVLPLDELKALYDEKLQTSDF  
FQALIAAIQSPEFATILDTLRALPEYQKLETLREKGVVDVDRIIE LLKAF  
FGLSRRGTRTLQDDLDDFLALIPVDQILGIALDYLANDPEVQDAVIYLSQ  
QEFHSIVLTVEGLQETKDLLKFVYDLGIDVYAILNTIHDIIILLPP

***Spinitermes trispinosus*** worker GIAJ01182109.1  
MKLPIVFLAVLGLVWCGKSLPTRTLQDDLDDFLALVPVDKVLEIALDYLAN  
DPEVQEAVIYLSQSEEFHKILTVEALQEFKDFVKFLNDLGVDVYTIINTI  
HDILGLPPFQPRHSTRRGVGLNGLIDDLIAVLPLDDLKALFNEKLQTSDF  
FQALVAGIQSEEFVIVNTLRRAIPEYQDLLQKL RDKGIDVDKIIELLRSL  
FGLPHKGTRTLQEDLDDFLALIPLDKVLEIALDYLANDPEVQEAVIYLSQ

EEFHKILTTVEALQEFKD

***Spinitermes trispinosus*** worker GIAJ01133998.1

MKLPIVFLAVLGLVCGKPVPTRSLKDDLKEFLALVPTDKVLEIALDYLAY  
DPEVKFVVYIQSEEFPPVHKIVEHLKEYKDCLRFINDEGVDVYAFINEI  
HDFLGFPPEPTNTTTPMGVGIYGLIRDVVAVLPVDDWAVLLDKMLETKES  
FQTLVTVINPTVLLNMVDTVRSWPEYHELLKILQEKFVEVHHIFELLKEL  
YWRESRSLDDLHDYMELVPKNKVFEIVLDYVANDPEVKKFIVYIQSEVL  
PMIPKIVEYLKEYKHCLKFINDEGVDVYAFILEIHDFLHLPPEPTNTTR  
MGVGFLGLIRDVIAVLPFDDFKAVFDKTETRKYFKTLVTAIHSLFVNVD  
TVRMMWPEYEKLLIIREKVVDVDRIIELFRELYLRGNHKKIQQDLKEFMAL  
VPTNKVFEIVLDYLAYDEEVREFVVYIQSEEFPIHKIVENLKEYEYCLK  
FINDEGVDIYAFILEIHDFLHLPPEPTNTKRMGVGFLGLVHDVIAVLP  
DDLKAVFDKTETRKYFKTLVTAIHSLFVNVDVTVRTWPEYEKLLIIREK  
VFDVDRIIEILRELYLRGNHKLQEDLKEFMALVPTNKVFEIVLDYVAYDE  
ELREFILYIQSEKFPPIHKIVENLKEYEYCLKFINDEGVDVYAFILEIHD  
ILGLPPFEPIDTTRMGVGIYGLIDDVYAVLPLEDLKAFIDMKIKTREYFK  
ILVTSKTTVTIRSPVILNMVDTVRLPEYQRVLVILRALPEYQRVLEI  
LREMGVDVVLIIERLRVLYGLLPY

***Palmitermes impostor*** worker GIAD01002139.1

FPPIHKIVENLKEYKYCLKFINDEGVDVYAIILEIHDIILGLPPFQPRHST  
RRGTGLNGLINDILDILPLDDLKDLFNKKLETSPDFQALVAGIQSEEFK  
IVDTLRALPEYQDLLQKLRDKGIDVDQIILLRSLFGLPRKGTRTLQDDL  
DEFLALIPLDKVLEIALDYLANDPEVQDAVIYLSGGEFHKILTSVEDLQE  
FKDFVKFISDLGVDVYTIINTIHDILGLPPFQPRHSTRRGTLNGLINDI  
LDILPLDDLKDLFNKKLETSPDFQALVAGIQSEEFKIVDTLRALPEYQD  
LLQKLRDKGIDVDQII

***Palmitermes impostor*** worker GIAD01002133.1

MKVPIIILAFLGLVCGKPLPSGSLQDELNDFLVLPVPTDKIFEIALDYLAN  
DPEVKELVVYIQSEEFPKIHRVVEYLNKYKDCLKFISDNGVDIYAIINEI  
HDTLERHPFQPTNTTHKVVGIIYGLIDDVAVLPFNDLMTLFDKKMETSKN  
LKTTLVTIIHSPVFMVMNAVRAWPEYHKLLIILQEKVVEVAHIEELLREI  
SWQGTNSLQDDLKDFVAIFPTDRVLEIALDYLSQEVKKFVVSIIQSEEF  
PKIHKVFEYVKEYKDCLKFINDQVVDVYAIKGIHDILERHPFQPTNTTR  
MSVGIIYGLIDDVVAVLPINELKTLFDKKMKTSKDFRTMVTAIHSPDFANM  
VETVQAWPEYKKLFESLRRKGVDERITEHLSALFGLSMRGTHRLQDDLK  
EFMALVPTDKVLEIALDYLANDQEVREFVVYIQSEEFPKIHKIVEHLKEY  
KDCLKFINNQGVDIYALINEIHDIPERHPFQPTNTTHMGVGIYGLIRDV

***Cephalotermes rectangularis*** worker GHZD01100093.1

KIVETLRAIPEYQELLQNLREKGVVDVLIIEFLRALFGLSRKGTRTLQDD  
LNDFLALVPLDKVLEIVLDYLANDAEVQEAVIYLSAEFAKILTTVENLQ  
EFRDFVKFINGLGVVYAIINAIHDVLGLPPFQPRHSTRRGVINGLLQD  
LIAVLPVDELKALFEQKLQTSDFQALVAGIQSAEFAKIVETLRAIPEYQ  
ELLQNLREKGVVDVLIIEFLRALFGLSRKGTRTLQDDLNDLALVPLDKV  
LEIVLDYLANDAEVQEAVIYLSAEFAKILTTVENLQEFRDFVKFING

***Macrotermes natalensis*** MA-1 from genome

MKLPIVILAVFGLVCGKSLPTRDLQDDLNDLALLPTDQIVEVALDYLAN  
DQEVQDFVVYIQSDEFHGIVTTVEALDEFKNFVKFIDGLGVNLTQIINTI

HDVIGLPPFQPRHSTRRGVGVSGLVDDVLALIPIDKIQALFEEKLQTSPD  
FQAFVQAVQSPEFQGILNTRLALPEYQNLLDNLRAGVDVDAIEFLRSI  
FGVSRRGNRNLQDDLNDLFLALLPTDQIVEVALDYLANDQEVQDFVVYIQS  
DEFHGIVTTVEALDEFKNFVQFIDGLGVNLTQIINTIHDVIGLPPFQPRH  
STRRGVGVSGLVDDVLALIPIDKIQALFEEKLQTSPDFQAFVQAVQSPEF  
QGILTTLRALPEYQNLLDNLRAGVDVDAIEFLRSIFGVGSL

***Macrotermes natalensis*** MA-2 from genome

MRISIVFLAVLGLVCGKPVENGSLQDDLNDFMALVPKDKVLEITLDYLHN  
DKQVQEIVAYVQSEEFPLIHTVVEYLQEYKDCLKFVNDHGVDVYAIVNEI  
HDRLGYPFFQPTNNTRTGFGINGLFDDVIAVLPRDDIIALVYQKKETIQL  
YRALYTVIRTPEYTNLMDTVRTLPEWKELRNILQQRGVDVERYFERIKEF  
FGLSRRGTRSLHEDVNDLIALVPTDKVLDILLDYLYNDEKVQKFVAYMQS  
EEFPLIHTVVEYLQQYKNCLKFVNDHGVDVYAIVSEIHDRLGYPFFQPTS  
FQPTNNTRTGVGINGLFDDVIAVLPRDDIIALVYQKKETIQLYKALYTVI  
RTLEFTNLVDTVRTLPEWKELRSILLQEGLDVDYIIERIKEFFGLSRLGI  
SRLQDDLNDLMALVPKDTVLEIVLDYLYNDEEVQEFIAVYVQSEEFPLIHT  
LVEYLQQYKNCLKFVNDHGVDVYAIVSEIHDRLGYPFFQPTNNTRTGFGI  
NGLFDDVIAVLPRDDIIALVYQKKETIQLYRALYTVIRTPEYTKFVNTVR  
TLPEWKELRNILQQRGVDVERYIESIKEFFGLSRRGTRSLHEDVNDLIAL  
VPTDKVLDILLDYLYNDEKVQKFVAYVQSEEFPKIHTLVEYLKQYKNCKVK  
YIDDSVIDIYAIVNEIHDSLGYPPFQPTNNTRTGVSINGPIVDMIAAVLR  
KDINFAVLPRDDMNALVYQKKETSQLYKTLYTVIRTPEYTNLVDTVRTLPE  
WKELRNILQEWGVDVDHIYELFRALFVQP

***Aparatermes* sp.** worker GHYZ01043183.1

ILNTHDVIGLPPYQPSRSTRRGVGLNGLIDDIAILPVDKLQALFIEKL  
QTSVDFQALIANIQGPEFAAILDELRALPEYQQFLQDLREKGVVDVHIE  
LLKALFGLSRRGTRNLQNDLDDLLALVPLTDVLAVALDYLANDLEVQDFM  
LYLQSAPFYKIIIGTVEGLQQFKDLLVIINNLGVDPYAIVNTIHDILGLPP  
YVPKHSTRKGVGINGLLTDVLALLPLDDLKAIFEQKKQTSVDFKALVSAI  
QSRDFAVIVDTLHGLSEYNSLLNNLRAYGVVDVGIIAYLRQLFDLPEF

***Aparatermes* sp.** worker GHYZ01043168.1

MKFPVAFLAVLGLVCGKPLPIAKFQEELNDLFLVLVPTDKILEITLDYVAN  
DTEVKEFIAYIQSEEFPKIHTILEHLQEYKECFPFITDQGVDVYELISEI  
YYVLEKHPPFQPTNTTRMGVGFYGLITDVMAVIPLDDL TALLDEKLETGEL  
FRSLLTEIHSLDVMKMDTVRTWPEYQEILEILREMIPIYVERIYKLLLEP  
SLRGIHRLQDDLKNLTALFPTEKVLEITLDYLANDPKLHEL FVYLQSEAF  
PRIHKVVEYLKEYKNCFKFINEEGIDVYAVLSEIHYILEGHPFQPTNTTR  
TGFGIYGLIDDVIAVLPLSVWKTLDKEMEASPYLKT LVKLLDFPAFMSI  
VNKVRSWPEYYELLEIIREKDVVDVDRITELLKELYRRGNPWLRSLKELM  
TLIPTDKVLEIVLDYLDYDQEVRGFIVRIQSEEFPRIHKT VGYLKEYTYC  
FKYINEQGIDIYQIISEIHYILEKHPPFQPTNTTRMGVGFYGLIDDVIAVL  
PFDDLA AFLDTKMETGEFFKNLLTAIRTLDIMKMVDTVKKIVDTVRTWPE  
YQEMLEILREMPYVENIYNILKELSLRGIHSLQDDLKELMVLVPTDKVL  
EITLDYLHEALVYIQSEEFPLIHKIVVYLKKYLD CFPFITDEGVDIYVIV  
NIVRDILGLTPIPTNITHMGLIHDVIAVLPLDDLKVLLDVKMETRVIYIR  
TLVKIIRSPVLVNMVETVKKMVETVRALPLYQRLL EILREKGVDELIIIE  
HLRVIFYPPRP

***Basidentitermes aurivillii*** worker GHZB01184459.1

ILSTVEGLQEFKDVVKFISDLGVDVNAIINQIHDFLGFPFQPRHSTRRG  
TGINGLIDDLLAILPLEDLKALFDSKLETSEEFNALITGILSEEFAQIVE  
TLRARPEYQDLIQKLVEKGVDVDRIIELVKALFGLSRKGTRTLQEDLDDF  
LALIPVDKVLEIALDYLANDLEVQEAVIYLQSEEFYLILSTVEGLQEFKD  
VVKFISDLGVDVNAIINQIHDFLGFPFQPRHSTRRG  
TGINGLIDDLLAILPLEDLKALFDSKLETSEEFNALITGILSEEFAQIVETLR

**Basidentitermes aurivillii** worker GHZB01184433.1  
YKNCLKYVNDRGVDVYAVIKKVYDTLPFPFPEPTNTIRTGVGFHGLKNDM  
IAAFPLSELKALVEKKMETRKYLKPLLPAKYIMVKTIQSPEFKEMVENVQ  
ETVRTMMVDFVRDYPEYKKQLEM LRKKFLNKERIMELLEELREPFWRVTN  
ILRDDLREFMTLVPTEKVLVITLEYLANDQELQEFFVYIQSEKFPMVHTI  
VEYLKQYKQCLKFIDDRGVNVYTIKKIHDTLGYPPPEPTNTTTRMGVGIH  
GLIHVVAVLPFYDLMALEKKMETSKDFKTLVTVIRSPVFMNMMHAVQA  
WPEYHKLLEILQQKVVDVHRIIEELLREISWRGTHSLQEDLNDFMVIFPTK  
KVLEIALDYLSNDQELKEFIVYIQSEEFPKIHRVVEYLKEYKNCFKFIND  
QGIDVYAIINVIYDILERHPFQPTNTTTRMGVGIYGLMDDVVAVLPVNELK  
TLFDKKMLTSKGFKSLVTAHSPFANTVDSVRAWPEYKKLLESLQRKGV  
DVDRIIEHLGALLGLSWRGTPRLQDDLKEFMALVPTDKVLEIALDYLAND  
QEVHEFVVYIQSEEFPKIHTIVENLKEYKDCFKFINDQGVDIYAFINEIY  
DTMEKHPFHPTNTTTRMGVGIYGLIDDVHAVLP

**Cubitermes sp.** worker+nymph GHZH01097255.1  
GLPPFQPRHSTRRGVINGLIEDLLAVLPLEELKALFDYKLANSDFKTL  
VEGIRSDTLAKIVETLRAIPEYQDLLQKL RDKGVDVDRIIEFVRALFGLS  
RKGTRTLQDDLNEFLALIPVDKVLEITLDYLANDVEVQEAVIYLQSEEFY  
KILSTVEALPEFKEFVQFINDLGVDVYAI

**Cubitermes sp.** worker+nymph GHZH01097272.1  
LWEISLRETHTLQDDLHEFMALFPTNKVFDIVLEYIKNDKEMLEFFVYIQ  
SEEFPIHRFVEYLKEYKDCFKFINDQGVVYAFILEIHDILGLPPYQPT  
NTPRMGVGIRGLVEDVIAVLPLHEFKALLDKKMETREYLKVVTAIRIHV  
PVLKKMVETVRTYPEYKKLLEILREKRVDADHIEFLRTLYELSWRGTRR  
LQDVLREFMAPVPMKFFEIFLDYLANDEEVREFVAYMQSEKFPKIHTVV  
ENLKEYKDCFKFINDQGVVYAIINEIHDNLEMHPFQPTNTTTRHGVIY  
LINDVVAVLPFEDWSALLDKKMETKDYFKTLVTTLMSPVFMNMMNTVQAW  
PEYNEMVEILRVMFVDVQRIIHLRELSMRETRSLQDDLKEFMVLFPTDK  
VIQITLDYLANDPELHEFFAYIQSEEFPKIHRVVEYLKQYKDCFKFISDQ  
GVDVYAFILEIHDILGLPPFQPTNTTTRMGFGFYGFIDDVYTVLPLDDLKA  
LFDMMMETRQYFKTIVTTIKTIVTTMRSPLFMMANTVRSWLEYQKLPET  
LQQMGVDMEGIEHLREQFGPDPLYNRR

**Indotermes sp. 1** worker GHZW01022852.1  
ALDYLANAVEVQEAVVYLQSAEFHLIVLTIEGLQETKNFLNFLVDLDVPA  
YEYLNLTHEIIGLPPIVPKNRTRRGVSGLLDDVLALLPLDDLKALFDE  
KLQTSPDFQAFVAGIQSPEFEVILDTLRALPEYQGLLESLREKGVDDAI  
LEFLKTLFGLSRRGTRTLQDDLNDFLALVPTDEILAVALDYLANDVEVQE  
AVIYLSQEFHKIVLTIEGLQETKNFLQFISNTGVDVYGYLNTLHEIIGL  
PPYVPKYSVRRGVGINGLLQDIIAVLPVDDLKALF

**Indotermes sp. 1** worker GHZW01126462.1  
MMKLSIIFVAVLGLACGKPLPSGGVQDDLNDFLEILPTDKLLEIGLDYLY

YDKEVKEFVVNIQSEKFPEINTFVEYLEEYKD C SKLINEYGVDVYEVIKG  
IHDFLSHPHEPKNTAS M GVGIIYGLISNVISVLPVDELKAFYYEK M ETRE  
YFKTLVKVVKSPVV M K M VDT M R D W PEYQEM L K IYQEKVVDVDRTIELLSK  
LY W RGP C K LLEDLKL M TYIPQHEAFEIVLDYLSTDKEVKEFVVYVQSEE  
FPKIHKIVEYLKENIY C SQFISEYGLDIYAIISEIHDILGLPPVKPTSTT  
HRGAGINGLIDDVIAILPLYDLKSFFEKK M ETRESFKTLVTVIQSPEFLD  
M M DTVQAW P KYQELLEILRGKGVDVDRIEELLRTLFSLS W RGNYSRLRYEL  
IRLVTLFPTDKILDIV M DYLYNDNEVKEFIVYIQSEEFPRIHKIVEYLKQ  
YKD C SKFINEYGVDIYAVVKQIHDTLRFPPYEP M N TTR M GVG F

***Promicrotermes sp.*** worker+soldier GIAF01064537.1

RGVGFNGLLDDIYAILPVEALKALYEEKLQTSPEFQALVGGLLSPEFAGL  
VDNLRAKQEYQVLLQSLLDKGIDVVRVVELIKALFGLSKKGTRTLEDDLN  
DFVALLPTDQILEIALDYLANDLEVQEAVIYIQSEEFHPILT TVEALQEF  
KDLLKYISDLGVDVYTIINQLHEILGLPPFQPRHSTRRGVGFNGLLDDIY  
AILPVEALKALYEEKLQTSPEFQALVGGLLSPEFAVSIH C VYLSYVS C C L  
W YVHASV C IPD M NALLHPTGTSG

***Nasutitermes sp.*** soldier GIAB01112380.1

IQSPEFAKILDTLRAIPEYQDLLQKLRDKGVDVDRIEELLKALFGLSRKG  
TRTLQDDLNDFLALVPVDKVLEIALDYLANDQEVQEAVIYLQTSPEFQKIL  
TTVEDLKEFKDFLKFLSDLGIDIYTIINTIHDVLGSPPFQPKHSVRRGVG  
INGLIDDVINVLPLNELKALFEEKLQTSPDFQALVKAIQSPEFANIVDTL  
RALPEYQALLQSLRDKGVDVDRIEELLRALFGLP

***Nasutitermes sp.*** soldier GIAB01104082.1

VDVYAIISEIHYILEGHPFQPTNTTTRTGVGIIYGLIDDVIAVLPLSE W KAL  
IDKK M EASQELKTLVKLIDIPAL M SVVDTVRS W PEYYELLEIVQEIVREK  
DVDVDRIIELFKQLYRRGTP W LQDSLKEF M ALIPTDKVLEISLDYLAYDQ  
EVREFIVYIQSEEFQIHKIVEYLQKYKD C FKYISEYGIDVYEIISEIHY  
M LEKHPPFQPTNTTR M GVGIIYGLISDVIAVIPLDDLAFLDKK M ETGEFFK  
NLLTAIRSIDV M K M VDTVRA W PEYQEM L EILRE M VPYVERIYKILRELSL  
RGIHRVQDDLKEF M ALVPTEKVLEITLDYLHEAFVYIQSEEFPKIHKIVE  
YLKKYKD C FPIISDQGVDIYGIVNEIRDILGLPPPIPPTNVTR M GLIDDVI  
AVLPLDDLKVLDD M K M ETRVYIKTVVTAIRSPVLVN M VETVQD M VETVQA  
LPQYQRLLEILREKGVDSIESIEHLRVIFYPPPP

***Amitermes sp.*** worker GHXC01038018.1

DIIAVLPVDELKALFNEKLETSPDFQALVAGIQSPEFAIIVEKLRALPEY  
QDLLQKLRDKGIDVDYFIELLRALFGLSRRGTRTLQDDLNDFLALVPLDK  
VLEIALDYLANDPEVQEAVIYLQSEEFHKIITTVEDLKEFRDFVKFINDL  
GVDVYAIINTIHDILGLPPFQPRHSTRRGSGLNGLIDDIIAVLPVDELKA  
LFNEKLETSPDFQALVAGIQSPEFAIIVEKLRA

***Amitermes sp.*** worker GHXC01011135.1

GVDVYAIINEIYDILRHPPFQPTNTTRKGVGIIYGLIDDEIAVLPVNLTAL  
LGKK M ETREIFKTLVTATHSPVFLK M VHTVRA W PEYNEVLEILQV M VVDV  
QHIIELF W ELYLEGTHSIRDDVKEF M ALVPTNKIFEIT M DYLAHDPHELHE  
IFAYIQSEQFPKIHKIVEYLYKQYKD C FSFINDEGVDVYAFILEIHDILGL  
PPFEPTNTTR M GVGIRGLINDVVAVLPIDD W AALLDKKLETEEFFQNLVT  
ANLSSAFVN M VNTVQA W PEYHEVHEILRE M VVNVKQITKIL W ELSLRETR  
SLQDDLHDF M ALVPTNKVFEVFNIALGYLSNNKELQEFVYIYIQSEEFPKI



HKIVEHLKEYKD<sup>C</sup>FKFINDQGVD<sup>M</sup>YEIINEIRDILDLPFQPTNTTRGIQ  
GLIDDVAVLPLDELKALYDKK<sup>M</sup>ETRYFKALNTLV TALKSPVFVN<sup>M</sup>VNT  
V

***Pericapritermes* sp.** worker GIAE01163624.1

GLNGLIDDVAVLPVDELKALFDEKLV TSPDFQALVAGIQSDEFGKIVDT  
LRALPQYQELLQRLREKGV DDKFIELLRALFGLSRKGTRTLQDDLNDFL  
ALVPTDKILEIALDYLANDPEVQDAVIY LQSEEFHSILLTVEALPEFKNF  
VKFISDLGVDIYTIINTIHDILGLPPFQPKHSTRRGFGLNGLIDDVAVL  
PVDELKALFDEKLV TSPDFQALVAGIQSDEFGKIVDTLRALPQYQELLQR  
LREKGV DDKFIELLRALFGLSR

***Pericapritermes* sp.** worker GIAE01058492.1

<sup>M</sup>WEFHRLQDDLKEF<sup>M</sup>ELNPTNKVLEIALDYLAYDEEVRKFV VYIQSEEFPKI  
HTIVEHLTEYKD<sup>C</sup>CLKFINDQGVDVYAI VNEIHDKLERHPYQPTNTTH<sup>M</sup>GV  
GFYGLVDDVFAVLPLDD<sup>M</sup>AALLDKK<sup>M</sup>ETGEFFKTIVTTIRSPVLVK<sup>M</sup>VDT  
VRAM<sup>M</sup>PEYHELLEILQEKVYGERIIKLV<sup>M</sup>EISRRGTHTLRNDLKEF<sup>M</sup>MALF  
PTDKVIQITLDYLSNDPELQEKFAYIHSEEF PRLHAIVEHFKEYAY<sup>C</sup>CLKF  
INDQGV DVYAFVNEIYDIFGLSPFQPTNTTTRTGGGIYGLINDVFGVLPLD  
DFKTLFYTK<sup>M</sup>ETREYFKTIITTIPFVFVKT VQTVRA<sup>M</sup>PEYHELIEIVRE  
KDFDVEHIFELFRKLYDREFHRLQDDLKEF<sup>M</sup>ELYPTDNVLEIALDY

***Hospitalitermes* sp.** worker GHZV01006778.1

AVIY LQSPEFEKII TTVEDLKEFKDFLKF LNDLGIDVYSILDTVHDVLGL  
PPFKPKHSVRRGVGLNGLIDDVINVLPLDELKALFEQKLQ TSPDFKALVA  
AIQSPEFANIVNTLRALPEYQDLLQALRDKGVDVDRIIELLRALFGLSRK  
GTRTLQDDLNDFLALVPLDKVLEIALDYLANDQEVQDAVIY LQSPEFQKI  
LTTVEDLKEFKDFLKFVDGLGVDIYSILNTIHDVIGLPPFKPKHSVRRGV  
GLNGLIDDVINVLPLDELKALFEQKLQ T

***Hospitalitermes* sp.** worker GHZV01006788.1

<sup>M</sup>MKLPIVFLAVLGLVYGKSLPTRTLQDDLNDFLALVPTNKVLEIYLEYLTN  
DPEVQEA IAYLQSEEFHVLLTTVENLKEFKDYVKF<sup>M</sup>NDLGVDVYELDNQI  
HDILGLPTLQPKPSTRRGVGLNGFID DVINVLPIDKFALFDEKLQTSPE  
FQALVA AIQSPEFVNILDTLRATPEYQDLLQRLQEKGFVDVDFNELFRAL  
FGLSQKGTPTLQDDLNDFLALVP<sup>M</sup>DKVLKIVLDYLSNDKEVREFV VHIQS  
EEFPKIHTTIEHLKKYKD<sup>C</sup>SKFNNDHADV VYVFINVIHDFLGLPPFQPTN  
ATR<sup>M</sup>GVGIYGLIEDVIAVLPLHDVKALFEV

***Promirotermes* sp.** worker+soldier GIAF01095832.1

FKAYFNKKTETREYFKALLTVIRSPEFVNI<sup>M</sup>DNVQNLVNTVQN<sup>M</sup>VYTVQT  
<sup>M</sup>WPEYK<sup>M</sup>LLEIVQEKRVDEDRIVELLKTLYDRS<sup>M</sup>QGTQRLVDELKQI<sup>M</sup>MAYF  
PTDKVLETTLDYLANDEELREFLVHIQSEEF PQIHKIVEHLKEYKN<sup>C</sup>CFK  
INNEGVDVYAI VNEIYEILERHPYQPTNTPR<sup>M</sup>GVGINGLIHDVVAVIPVE  
DLTNHLDKE<sup>M</sup>QIREFFKPLVTALKSPVLKN<sup>M</sup>VNTVQA<sup>M</sup>PEYNELREILRQ  
<sup>M</sup>MVSDAEPHIKNL<sup>M</sup>ELSLRGTHNLRQDVKEF<sup>M</sup>MALVPTEQLIQITLDYLTND  
PQLQEIIYAYIQPEQFPKIHEIVEYVKEYKY<sup>C</sup>CFKFINDEGV D VYEFINEIY  
HILNLPFQPTNTTR<sup>M</sup>GVGIYGLIDDVAVLPFSDL<sup>M</sup>ALFD<sup>M</sup>K<sup>M</sup>METSKDF  
KTLVTIIHSPVF<sup>M</sup>M<sup>M</sup>VKTVRA<sup>M</sup>PEYHQLLGILQEKFVDVEHIIELLREIS  
<sup>M</sup>WRGTHSLQDDLKDFMAIFPTDKVLEIALDYLANDQEVKDFV VYIQSEEFH  
KIHTVVEYLKEYKD<sup>C</sup>CFKFINDHGV D VYAIINEIHDSLE
